# Supplementary material
Source: Springer Nature journal article supplement (https://www.springerprofessional.de/resource/supplementary/40294_2012_21_MOESM8_ESM.pdf/11899520)

# Effect of population size on network characteristics (95% Confidence Interval)

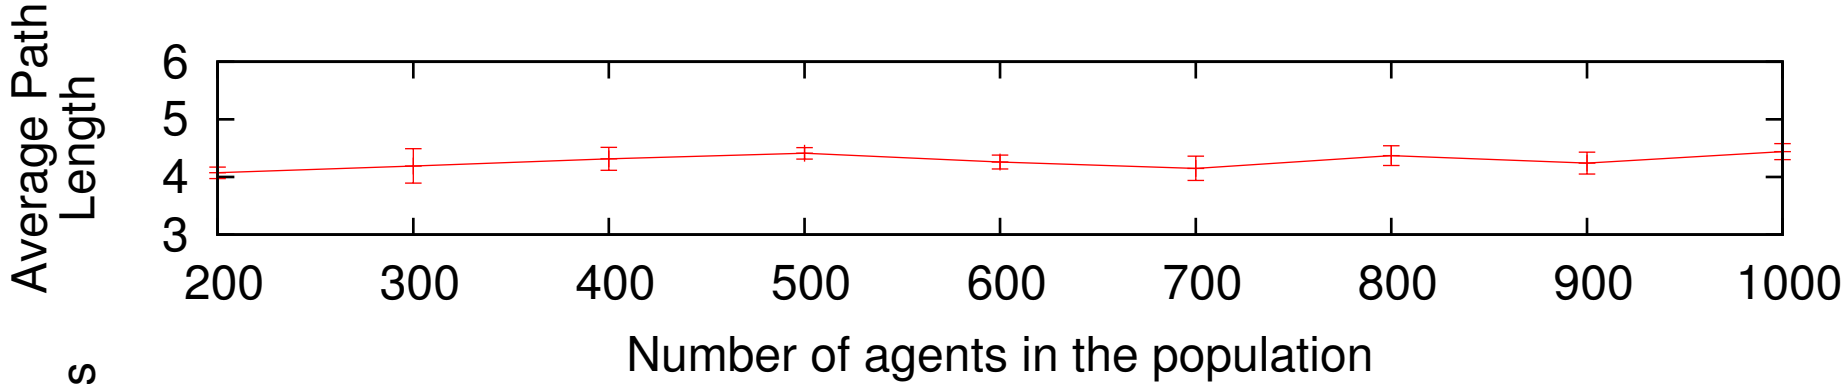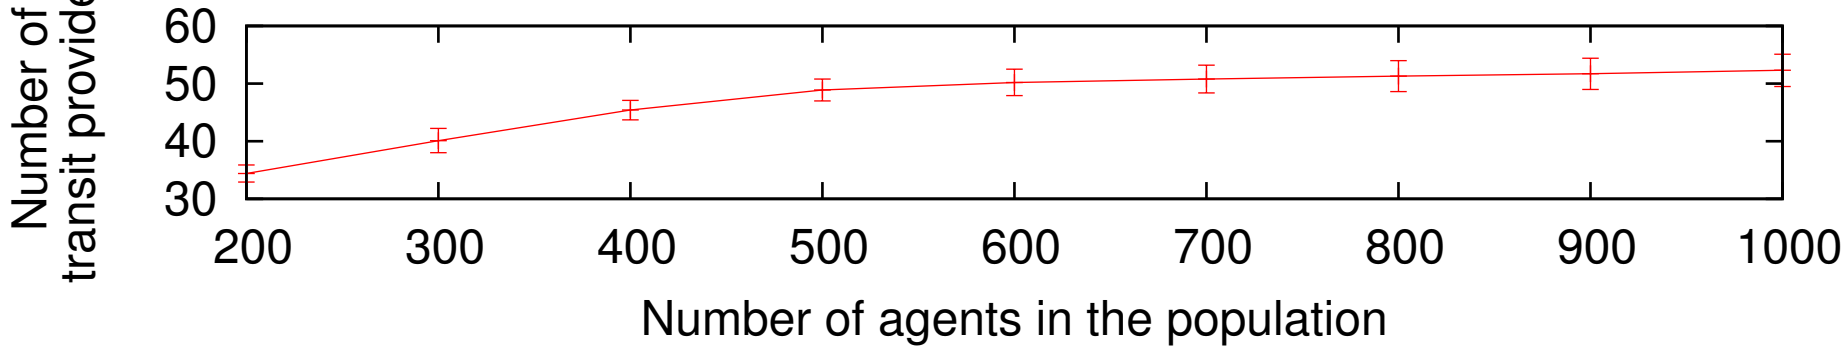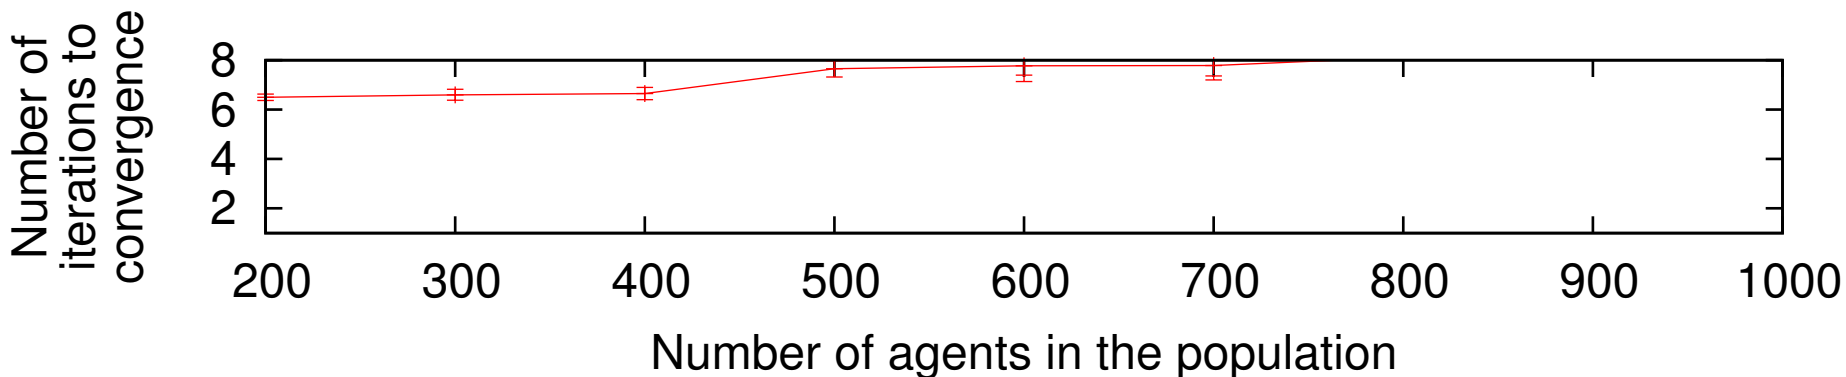

Supplement: MOESM8 [file 11899520]
